# Supplementary material
Source: PubMed Central journal article supplement (PMC9678008)
Supplement: NIHMS1845114-supplement-Supplementary_File_2_Table_of_Materials.pdf [file NIHMS1845114-supplement-Supplementary_File_2_Table_of_Materials.pdf]

# Models of Murine Vaginal Colonization by Anaerobically Grown Bacteria

Sydney R. Morrill<sup>1,2,3</sup>, Kavita Agarwal<sup>2,3</sup>, Sudeshna Saha<sup>2,3</sup>, Warren G. Lewis<sup>2,3</sup>, Nicole M. Gilbert<sup>4</sup>, Amanda L. Lewis<sup>2,3</sup>

<sup>1</sup>Division of Biology and Biomedical Sciences, Washington University School of Medicine <sup>2</sup>Department of Obstetrics, Gynecology, and Reproductive Sciences, University of California <sup>3</sup>Glycobiology Research and Training Center, UCSD <sup>4</sup>Department of Pediatrics, Washington University School of Medicine

## Corresponding Author

Amanda L. Lewis  
a1lewis@health.ucsd.edu

## Citation

Morrill, S.R., Agarwal, K., Saha, S., Lewis, W.G., Gilbert, N.M., Lewis, A.L. Models of Murine Vaginal Colonization by Anaerobically Grown Bacteria. *J. Vis. Exp.* (), e64032, doi:10.3791/64032 (2022).

## Date Published

May 25, 2022

## DOI

10.3791/64032

## URL

jove.com/video/64032

## Materials

| Name                                                               | Company            | Catalog Number | Comments                                                                                      |
|--------------------------------------------------------------------|--------------------|----------------|-----------------------------------------------------------------------------------------------|
| β-estradiol 17-valerate                                            | Sigma              | E1631          | estrogenization of mice                                                                       |
| 0.22 μm, 50 mL Steriflip vacuum filter                             | Fisher             | SCGP00525      | sterile filtering sesame oil                                                                  |
| 14 mL tube                                                         | Falcon             | 352059         | estrogenization of mice                                                                       |
| 190-proof ethanol                                                  | Koptec             | V1105M         | dissection, tissue homogenization, CDC and Columbia media                                     |
| 1x PBS                                                             | Fisher             | MT21040CM      | vaginal lavage, <i>G. vaginalis</i> inoculum prep, tissue collection and homogenization       |
| 25 G × 5/8 -in needle                                              | BD                 | 305122         | estrogenization of mice                                                                       |
| 5 mL tube                                                          | Falcon             | 352063         | Tissue collection and homogenization                                                          |
| Anaerobic chamber                                                  | Coy                | 7200000        | Growth of anaerobic bacteria                                                                  |
| Bacto agar                                                         | Fisher             | DF0140074      | <i>G. vaginalis</i> , <i>F. nucleatum</i> , and <i>P. bivia</i> agar plates                   |
| Bacto peptone                                                      | Fisher             | DF0118170      | CDC anaerobic media for <i>P. bivia</i> growth                                                |
| Columbia broth                                                     | Fisher             | DF0944170      | Columbia media for <i>F. nucleatum</i> growth                                                 |
| Defibrinated sheep blood                                           | Hemostat           | DSB500         | CDC anaerobic media for <i>P. bivia</i> growth                                                |
| Forceps                                                            | Fine Science Tools | 11008-13       | mouse/tissue dissection                                                                       |
| Glucose                                                            | Sigma              | G7528          | NYCIII media for <i>G. vaginalis</i> growth                                                   |
| Handheld homogenizer                                               | ISC Bio            | 33055500       | Tissue homogenization                                                                         |
| Hemin                                                              | Sigma              | 51280          | CDC anaerobic media for <i>P. bivia</i> growth, Columbia media for <i>F. nucleatum</i> growth |
| HEPES                                                              | Cellgro            | 25-060-CI      | NYCIII media for <i>G. vaginalis</i> growth                                                   |
| Horse serum                                                        | Hemostat           | SHS500         | NYCIII media for <i>G. vaginalis</i> growth                                                   |
| Hydrogen gas mix (5% hydrogen, 10% CO <sub>2</sub> , 85% nitrogen) | Matheson           |                | Gas for anaerobic chamber                                                                     |

|                                                |                    |             |                                                |
|------------------------------------------------|--------------------|-------------|------------------------------------------------|
| Isofluorane                                    | VetOne             | 502017      | mouse anaesthesia at sacrifice                 |
| L-cysteine                                     | Sigma              | C1276       | CDC anaerobic media for <i>P. bivia</i> growth |
| L-glutamate                                    | Sigma              | G1626       | CDC anaerobic media for <i>P. bivia</i> growth |
| Milli-Q Water Purifier                         | Millipore          | IQ-7000     | for making media and homogenization            |
| NaCl                                           | Sigma              | S3014       | NYCIII media for <i>G. vaginalis</i> growth    |
| NaOH tablets                                   | Sigma              | S5881       | CDC anaerobic media for <i>P. bivia</i> growth |
| Nitrogen gas                                   | Airgas             |             | Gas for anaerobic chamber                      |
| p-200 filter tips                              | ISC Bio            | P-1237-200  | vaginal lavages and bacterial inoculations     |
| pancreatic digest of casein                    | Sigma              | 70169       | CDC anaerobic media for <i>P. bivia</i> growth |
| Proteose peptone #3                            | Fisher             | DF-122-17-4 | NYCIII media for <i>G. vaginalis</i> growth    |
| Scissors                                       | Fine Science Tools | 14084-08    | mouse/tissue dissection                        |
| Sesame oil                                     | Fisher             | ICN15662191 | estrogenization of mice                        |
| Single edge surgical carbon steel razor blades | VWR                | 55411-050   | tissue dissection                              |
| Sodium chloride                                | Sigma              | S3014       | CDC anaerobic media for <i>P. bivia</i> growth |
| Spectrophotometer                              | BioChrom           | 80-3000-45  | measuring bacterial OD600                      |
| Streptomycin                                   | Gibco              | 11860038    | add to agar media to make selective plates     |
| Tuberculin slip tip 1ml syringe                | BD                 | 309659      | estrogenization of mice                        |
| Vitaim K3                                      | Sigma              | M5625       | Columbia media for <i>F. nucleatum</i> growth  |
| Vitamin K1                                     | Sigma              | 95271       | CDC anaerobic media for <i>P. bivia</i> growth |
| Yeast extract                                  | Fisher             | DF0127-17-9 | NYCIII media for <i>G. vaginalis</i> growth    |
